# Supplementary material for: Risks Related to Chikungunya Infections among European Union Travelers, 2012–2018
Source: PubMed Central journal article supplement (PMC7258487; doi:10.3201/eid2606.190490), 2020-06
Supplement: 19-0490-Techapp-s1.pdf [file 19-0490-Techapp-s1.pdf]

# Risks Related to Chikungunya Infections among European Union Travelers, 2012–2018

## Appendix

**Appendix Table.** Travelers returning from countries of infection, chikungunya cases and rates of infection among travelers, per reporting country and per region of infection, 2012–2018

| Region of infection         | Variable      | Czech Republic | France    | Germany   | Greece  | Hungary | Ireland | Italy     | Latvia | Malta  | Slovenia | Spain     | Sweden    | United Kingdom | Total      |
|-----------------------------|---------------|----------------|-----------|-----------|---------|---------|---------|-----------|--------|--------|----------|-----------|-----------|----------------|------------|
| South America               | No. cases     | 2              | 60        | 88        | 1       | 0       | 0       | 20        | 1      | 0      | 0        | 256       | 13        | 30             | 471        |
|                             | % cases       | 0              | 13        | 19        | 0       | 0       | 0       | 4         | 0      | 0      | 0        | 54        | 3         | 6              | 100        |
|                             | No. travelers | 162,021        | 4,903,438 | 3,047,638 | 173,748 | 111,014 | 276,454 | 4,295,986 | 12,123 | 28,604 | 9,766    | 7,893,846 | 399,818   | 3,180,034      | 24,494,490 |
|                             | % travelers   | 1              | 20        | 12        | 1       | 0       | 1       | 18        | 0      | 0      | 0        | 32        | 2         | 13             | 100        |
| No. cases/100,000 travelers |               | 1.2            | 1.2       | 2.9       | 0.6     | 0.0     | 0.0     | 0.5       | 8.2    | 0.0    | 0.0      | 3.2       | 3.3       | 0.9            | 1.9        |
| Central America             | No. cases     | 1              | 17        | 42        | 0       | 0       | 0       | 6         | 1      | 0      | 0        | 75        | 8         | 14             | 164        |
|                             | % cases       | 1              | 10        | 26        | 0       | 0       | 0       | 4         | 1      | 0%     | 0        | 46        | 5         | 9              | 100        |
|                             | No. travelers | 112,110        | 2,511,193 | 1,968,031 | 65,921  | 55,717  | 218,566 | 1,684,064 | 5,414  | 4,100  | 3,107    | 3,901,031 | 208,446   | 2,921,617      | 13,659,317 |
|                             | % travelers   | 1              | 18        | 14        | 0       | 0       | 2       | 12        | 0      | 0      | 0        | 29        | 2         | 21             | 100        |
| No. cases/100,000 travelers |               | 0.9            | 0.7       | 2.1       | 0.0     | 0.0     | 0.0     | 0.4       | 18.5   | 0.0    | 0.0      | 1.9       | 3.8       | 0.5            | 1.2        |
| Caribbean                   | No. cases     | 3              | 723       | 113       | 1       | 0       | 0       | 1         | 0      | 0      | 0        | 208       | 10        | 229            | 1,288      |
|                             | % cases       | 0              | 56        | 9         | 0       | 0       | 0       | 0         | 0      | 0      | 0        | 16        | 1         | 18             | 100        |
|                             | No. travelers | 72,741         | 9,174,056 | 3,275,191 | 124,203 | 51,204  | 184,373 | 1,842,732 | 7,197  | 5,918  | 2,999    | 2,565,094 | 166,131   | 5,093,514      | 22,565,353 |
|                             | % travelers   | 0              | 41        | 15        | 1       | 0       | 1       | 8         | 0      | 0      | 0        | 11        | 1         | 23             | 100        |
| No. cases/100,000 travelers |               | 4.1            | 7.9       | 3.5       | 0.8     | 0.0     | 0.0     | 0.1       | 0.0    | 0.0    | 0.0      | 8.1       | 6.0       | 4.5            | 5.7        |
| Polynesia                   | No. cases     | 0              | 25        | 2         | 0       | 1       | 0       | 1         | 0      | 0      | 0        | 0         | 1         | 1              | 31         |
|                             | % cases       | 0              | 81        | 6         | 0       | 3       | 0       | 3         | 0      | 0      | 0        | 0         | 3         | 3              | 100        |
|                             | No. travelers | 2,173          | 229,507   | 20,939    | 311     | 640     | 648     | 29,670    | 48     | 4      | 18       | 4,287     | 1,305     | 19,942         | 309,492    |
|                             | % travelers   | 1              | 74        | 7         | 0       | 0       | 0%      | 10        | 0      | 0      | 0        | 1         | 0         | 6              | 100        |
| No. cases/100,000 travelers |               | 0.0            | 10.9      | 9.6       | 0.0     | 156.3   | 0.0     | 3.4       | 0.0    | 0.0    | 0.0      | 0.0       | 76.6      | 5.0            | 10.0       |
| Southeast Asia              | No. cases     | 6              | 36        | 44        | 0       | 2       | 0       | 5         | 0      | 0      | 1        | 13        | 22        | 41             | 170        |
|                             | % cases       | 4              | 21        | 26        | 0       | 1       | 0       | 3         | 0      | 0      | 1        | 8         | 13        | 24             | 100        |
|                             | No. travelers | 900,842        | 7,452,958 | 9,180,076 | 471,147 | 394,600 | 737,448 | 3,906,500 | 60,746 | 57,290 | 25,785   | 1,926,236 | 2,247,704 | 12,763,650     | 40,124,982 |
|                             | % travelers   | 2              | 19        | 23        | 1       | 1       | 2       | 10        | 0      | 0      | 0        | 5         | 6         | 32             | 100        |
| No. cases/100,000 travelers |               | 0.7            | 0.5       | 0.5       | 0.0     | 0.5     | 0.0     | 0.1       | 0.0    | 0.0    | 3.9      | 0.7       | 1.0       | 0.3            | 0.4        |
| Southern Asia               | No. cases     | 2              | 29        | 49        | 2       | 2       | 0       | 14        | 0      | 1      | 1        | 14        | 13        | 231            | 358        |
|                             | % cases       | 1              | 8         | 14        | 1       | 1       | 0       | 4         | 0      | 0      | 0        | 4         | 4         | 65             | 100        |
|                             | No. travelers | 312,422        | 2,692,308 | 3,665,391 | 309,442 | 159,751 | 420,886 | 3,080,787 | 32,955 | 25,205 | 13,289   | 1,320,540 | 658,255   | 15,589,994     | 28,281,225 |

| Region of infection | Variable                    | Czech Republic | France     | Germany    | Greece    | Hungary | Ireland   | Italy      | Latvia  | Malta   | Slovenia | Spain      | Sweden    | United Kingdom | Total       |
|---------------------|-----------------------------|----------------|------------|------------|-----------|---------|-----------|------------|---------|---------|----------|------------|-----------|----------------|-------------|
|                     | % travelers                 | 1              | 10         | 13         | 1         | 1       | 1         | 11         | %       | 0       | 0        | 5          | 2         | 55             | 100         |
|                     | No. cases/100,000 travelers | 0.6            | 1.1        | 1.3        | 0.6       | 1.3     | 0.0       | 0.5        | 0.0     | 4.0     | 7.5      | 1.1        | 2.0       | 1.5            | 1.3         |
| Eastern Africa      | No. cases                   | 2              | 6          | 13         | 0         | 3       | 1         | 3          | 0       | 0       | 0        | 1          | 6         | 34             | 69          |
|                     | % cases                     | 3              | 9          | 19         | 0         | 4       | 1         | 4          | 0       | 0       | 0        | 1          | %         | 49             | 100         |
|                     | No. travelers               | 37,692         | 504,745    | 883,014    | 30,500    | 18,575  | 89,010    | 763,530    | 2,333   | 3,518   | 2,244    | 141,782    | 318,628   | 2,160,906      | 4,956,477   |
|                     | % travelers                 | 1              | 10         | 18         | 1         | 0       | 2         | 15         | 0       | 0       | 0        | 3          | 6         | 44             | 100         |
|                     | No. cases/100,000 travelers | 5.3            | 1.2        | 1.5        | 0.0       | 16.2    | 1.1       | 0.4        | 0.0     | 0.0     | 0.0      | 0.7        | 1.9       | 1.6            | 1.4         |
| Central Africa      | No. cases                   | 0              | 16         | 6          | 0         | 0       | 0         | 0          | 0       | 0       | 0        | 14         | 0         | 2              | 38          |
|                     | % cases                     | 0              | 42         | 16         | 0         | 0       | 0         | 0          | 0       | 0       | 0        | 37         | 0         | 5              | 100         |
|                     | No. travelers               | 5,900          | 1,618,405  | 240,661    | 11,459    | 5,699   | 16,992    | 317,675    | 3,622   | 1,814   | 1,080    | 203,446    | 21,987    | 531,186        | 2,979,926   |
|                     | % travelers                 | 0              | 54         | 8          | 0         | 0       | 1         | 11         | 0       | 0       | 0        | 7          | 1         | 18             | 100         |
|                     | No. cases/100,000 travelers | 0.0            | 1.0        | 2.5        | 0.0       | 0.0     | 0.0       | 0.0        | 0.0     | 0.0     | 0.0      | 6.9        | 0.0       | 0.4            | 1.3         |
| Northern Africa     | No. cases                   | 0              | 0          | 1          | 0         | 0       | 0         | 0          | 0       | 0       | 0        | 0          | 0         | 2              | 3           |
|                     | % cases                     | 0              | 0          | 33         | 0         | 0       | 0         | 0          | 0       | 0       | 0        | 0          | 0         | 67             | 100         |
|                     | No. travelers               | 1,758          | 18,934     | 56,647     | 7,915     | 2,849   | 10,549    | 34,015     | 141     | 964     | 166      | 6,200      | 31,009    | 109,720        | 280,867     |
|                     | % travelers                 | 1              | 7          | 20         | 3         | 1       | 4         | 12         | 0       | 0       | 0        | 2          | 11        | 39             | 100         |
|                     | No. cases/100,000 travelers | 0.0            | 0.0        | 1.8        | 0.0       | 0.0     | 0.0       | 0.0        | 0.0     | 0.0     | 0.0      | 0.0        | 0.0       | 1.8            | 1.1         |
| Western Africa      | No. cases                   | 0              | 6          | 1          | 0         | 0       | 0         | 1          | 0       | 0       | 0        | 6          | 1         | 9              | 24          |
|                     | % cases                     | 0              | 25         | 4          | 0         | 0       | 0         | 4          | 0       | 0       | 0        | 25         | 4         | 38             | 100         |
|                     | No. travelers               | 13,371         | 2,973,007  | 486,875    | 37,915    | 18,670  | 169,197   | 1,446,465  | 2,925   | 3,649   | 1,299    | 527,591    | 91,501    | 2,865,817      | 8,638,282   |
|                     | % travelers                 | 0              | 34         | 6          | 0         | 0       | 2         | 17         | 0       | 0       | %        | 6          | 1         | 33             | 100         |
|                     | No. cases/100,000 travelers | 0.0            | 0.2        | 0.2        | 0.0       | 0.0     | 0.0       | 0.1        | 0.0     | 0.0     | 0.0      | 1.1        | 1.1       | 0.3            | 0.3         |
| Total               | No. cases                   | 16             | 918        | 359        | 4         | 8       | 1         | 51         | 2       | 1       | 2        | 587        | 74        | 593            | 2,616       |
|                     | % cases                     | 1              | 35         | 14         | 0         | 0       | 0         | 2          | 0       | 0       | 0        | 22         | 3         | 23             | 100         |
|                     | No. travelers               | 1,621,030      | 32,078,551 | 22,824,463 | 1,232,561 | 818,719 | 2,124,123 | 17,401,424 | 127,504 | 131,066 | 59,753   | 18,490,053 | 4,144,784 | 45,236,380     | 146,290,411 |
|                     | % travelers                 | 1              | 22         | 16         | 1         | 1       | 1         | 12         | 0       | 0       | 0        | 13         | 3         | 31             | 100         |
|                     | No. cases/100,000 travelers | 1.0            | 2.9        | 1.6        | 0.3       | 1.0     | 0.0       | 0.3        | 1.6     | 0.8     | 3.3      | 3.2        | 1.8       | 1.3            | 1.8         |

**Supplemental file – Appendix figure. Inclusion criteria**

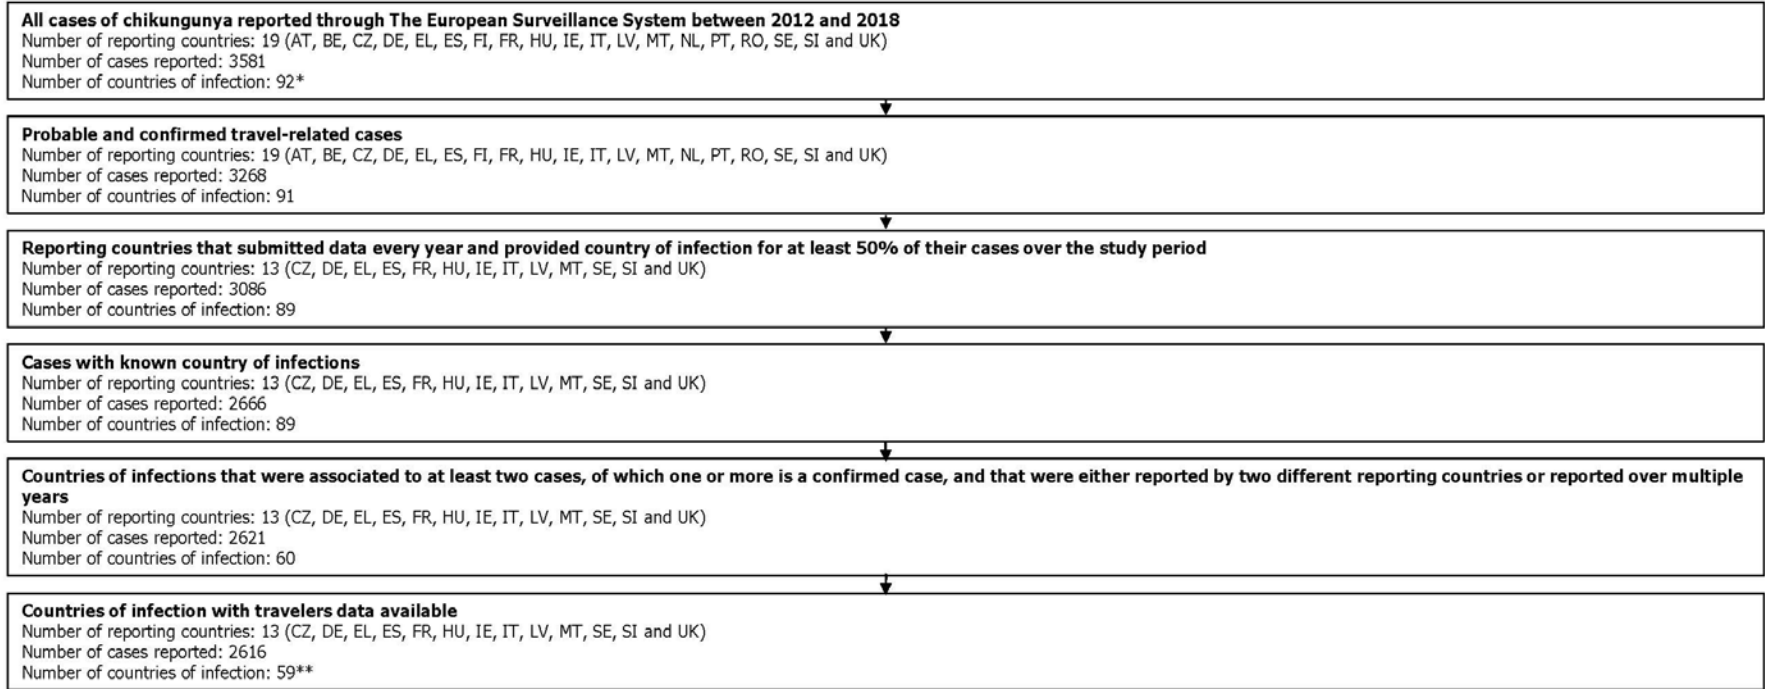

Note: AT (Austria), BE (Belgium), CZ (Czech Republic), DE (Germany), EL (Greece), ES (Spain), FI (Finland), FR (France), HU (Hungary), IE (Ireland), IT (Italy), LV (Latvia), MT (Malta), NL (The Netherlands), PT (Portugal), RO (Romania), SE (Sweden), SI (Slovenia) and UK (The United Kingdom)

\* Afghanistan, Angola, Antigua and Barbuda, Argentina, Australia, Bangladesh, Barbados, Benin, Bolivia, Brazil, British Virgin Islands, Burkina Faso, Cambodia, Cameroon, Central African Republic, Colombia, Congo, Cook Islands, Costa Rica, Cuba, Democratic Republic of the Congo, Djibouti, Dominica, Dominican Republic, East Timor, Ecuador, Egypt, El Salvador, Equatorial Guinea, Eritrea, Ethiopia, Fiji, France, French Guiana, French Polynesia, Gambia, Ghana, Grenada and South Grenadines, Guadeloupe Saint Barthélemy and Saint Martin, Guatemala, Guyana, Haiti, Honduras, India, Indonesia, Ivory Coast, Jamaica, Kenya, Malawi, Malaysia, Maldives, Mali, Marshall Islands, Martinique, Mauritius, Mexico, Montserrat, Morocco, Mozambique, Myanmar, Nicaragua, Nigeria, Pakistan, Panama, Papua New Guinea, Paraguay, Peru, Philippines, Puerto Rico, Saint Lucia, Saint Vincent and Grenadines, San Marino, Senegal, Sierra Leone, Singapore, Sint Maarten, Somalia, Sri Lanka, Sudan, Suriname, Tanzania, Thailand, Togo, Tonga, Trinidad and Tobago, Uganda, United States, Venezuela, Vietnam, Western Samoa and Zimbabwe

\*\* Angola, Bangladesh, Barbados, Bolivia, Brazil, Burkina Faso, Cambodia, Cameroon, Colombia, Congo, Costa Rica, Cuba, Democratic Republic of the Congo, Dominica, Dominican Republic, Ecuador, El Salvador, Equatorial Guinea, Eritrea, French Guiana, French Polynesia, Gambia, Grenada and South Grenadines, Guadeloupe Saint Barthélemy and Saint Martin, Guatemala, Guyana, Haiti, Honduras, India, Indonesia, Ivory Coast, Jamaica, Kenya, Malaysia, Martinique, Mexico, Nicaragua, Nigeria, Pakistan, Paraguay, Peru, Philippines, Saint Lucia, Saint Vincent and Grenadines, Senegal, Singapore, Sint Maarten, Somalia, Sri Lanka, Sudan, Suriname, Tanzania, Thailand, Tonga, Trinidad and Tobago, Uganda, Venezuela, Vietnam, and Western Samoa

**Appendix Figure.** Inclusion criteria for study of risks related to chikungunya infections among European Union travelers, 2012–2018.
